# Supplementary material
Source: MDPI journal article supplement (https://www.mdpi.com/2304-6732/11/3/283)
Supplement: s1 [file s1]

# Pseudo-Stilbene- and Azobenzene-Type Systems for Optical Frequency Conversion: Estimating the First-Order Molecular Hyperpolarizability

Raiane S. Araújo <sup>1</sup>, José J. Rodrigues, Jr. <sup>2</sup>, Márcio A. R. C. Alencar <sup>2</sup>, Jamal Rafique <sup>3,4</sup>, Sumbal Saba <sup>3</sup> and Luis M. G. Abegão <sup>5,\*</sup>

<sup>1</sup> School of Engineering, Mackenzie Presbyterian University, São Paulo 01302-907, SP, Brazil

<sup>2</sup> Department of Physics, Federal University of Sergipe, São Cristóvão 49100-000, SE, Brazil;  
joatan@academico.ufs.br (J.J.R.J.); marcalencarufs@academico.ufs.br (M.A.R.C.A.)

<sup>3</sup> Sustainable Synthesis and Organochalcogen Laboratory, Institute of Chemistry, Federal University of Goiás, Goiânia 74690-900, GO, Brazil; sumbalsaba@ufg.br (S.S.)

<sup>4</sup> Institute of Chemistry, Federal University of Mato Grosso do Sul, Campo Grande 79074-460, MS, Brazil

<sup>5</sup> Photonics Group, Institute of Physics, Federal University of Goiás, Goiânia 74690-900, GO, Brazil

\* Correspondence: luis.abegao@ufg.br

---

## Table of Contents

|   |                                                                                          |     |
|---|------------------------------------------------------------------------------------------|-----|
| 1 | Optimized Geometries                                                                     | S2  |
| 2 | Geometric parameters of the compounds                                                    | S6  |
|   | Table S1-A                                                                               | S6  |
| 3 | First-Order Molecular Hyperpolarizability Calculation                                    | S7  |
|   | Table S2-A                                                                               | S7  |
|   | Table S2-B                                                                               | S7  |
|   | Table S2-C                                                                               | S7  |
|   | Table S3-A                                                                               | S8  |
|   | Table S3-B                                                                               | S8  |
|   | Table S3-C                                                                               | S9  |
|   | Table S3-D                                                                               | S10 |
|   | Table S3-E                                                                               | S10 |
|   | Table S3-F                                                                               | S10 |
|   | Table S3-G                                                                               | S11 |
|   | Table S3-H                                                                               | S11 |
|   | Table S3-I                                                                               | S12 |
| 4 | Scheme S1. Synthetic approach to access <b>PS-1</b> , <b>PS-2</b> , <b>PS-3</b>          | S13 |
|   | Scheme S2. Possible synthetic approach to access <b>AB-1</b> , <b>AB-2</b> , <b>AB-3</b> | S14 |

## S1. Optimized Geometries

| Compound: PS-1                    |          |          |          | Compound: PS-2                    |          |          |          |
|-----------------------------------|----------|----------|----------|-----------------------------------|----------|----------|----------|
| Cartesian coordinates (after OPT) |          |          |          | Cartesian coordinates (after OPT) |          |          |          |
| N                                 | 0.47997  | 0.57529  | -0.00106 | C                                 | 0.49916  | 0.47195  | -0.09704 |
| N                                 | -0.24421 | -0.44264 | 0.00123  | N                                 | -0.30291 | -0.48452 | 0.12449  |
| C                                 | 1.87037  | 0.30933  | -0.00073 | C                                 | 1.95616  | 0.29087  | -0.06302 |
| C                                 | 2.42995  | -0.96965 | -0.00452 | C                                 | 2.53428  | -0.94515 | 0.23014  |
| C                                 | 3.79840  | -1.12078 | -0.00417 | C                                 | 3.90380  | -1.08888 | 0.25049  |
| C                                 | 4.60071  | 0.01088  | -0.00007 | C                                 | 4.69379  | 0.01728  | -0.02315 |
| C                                 | 4.06901  | 1.28777  | 0.00352  | C                                 | 4.15251  | 1.25485  | -0.31507 |
| C                                 | 2.69652  | 1.42932  | 0.00301  | C                                 | 2.77731  | 1.38309  | -0.33294 |
| C                                 | -1.62027 | -0.23509 | 0.00060  | C                                 | -1.69364 | -0.28283 | 0.12123  |
| C                                 | -2.24649 | 1.01798  | -0.00254 | C                                 | -2.32086 | 0.93066  | 0.40251  |
| C                                 | -3.61207 | 1.11821  | -0.00284 | C                                 | -3.69469 | 1.04768  | 0.38266  |
| C                                 | -4.43354 | -0.03784 | 0.00000  | C                                 | -4.51896 | -0.05247 | 0.08064  |
| C                                 | -3.79085 | -1.29494 | 0.00312  | C                                 | -3.87887 | -1.27302 | -0.19762 |
| C                                 | -2.41959 | -1.37842 | 0.00340  | C                                 | -2.50423 | -1.37946 | -0.15566 |
| N                                 | 6.04979  | -0.15098 | 0.00031  | N                                 | 6.14723  | -0.13009 | -0.00186 |
| O                                 | 6.50437  | -1.28343 | -0.00273 | O                                 | 6.61096  | -1.22736 | 0.25923  |
| O                                 | 6.74316  | 0.85308  | 0.00370  | O                                 | 6.82977  | 0.85052  | -0.24635 |
| N                                 | -5.78505 | 0.06441  | -0.00027 | N                                 | -5.88974 | 0.05682  | 0.08594  |
| C                                 | -6.42602 | 1.36663  | -0.00300 | C                                 | -6.49488 | 1.37370  | 0.12200  |
| C                                 | -6.60828 | -1.13032 | 0.00292  | C                                 | -6.68761 | -1.03136 | -0.44318 |
| H                                 | 1.78372  | -1.83459 | -0.00782 | H                                 | 0.15573  | 1.48113  | -0.34079 |
| H                                 | 4.25118  | -2.10092 | -0.00714 | H                                 | 1.89345  | -1.78962 | 0.44075  |
| H                                 | 4.72176  | 2.14749  | 0.00658  | H                                 | 4.36495  | -2.03893 | 0.47453  |
| H                                 | 2.24449  | 2.41194  | 0.00562  | H                                 | 4.79804  | 2.09461  | -0.52301 |
| H                                 | -1.64106 | 1.91364  | -0.00473 | H                                 | 2.33398  | 2.34439  | -0.55985 |
| H                                 | -4.06174 | 2.09940  | -0.00529 | H                                 | -1.73327 | 1.80029  | 0.66851  |
| H                                 | -4.37106 | -2.20467 | 0.00533  | H                                 | -4.13104 | 2.00633  | 0.61939  |
| H                                 | -1.93542 | -2.34719 | 0.00583  | H                                 | -4.45742 | -2.15158 | -0.43961 |
| H                                 | -6.15766 | 1.94502  | -0.89048 | H                                 | -2.03346 | -2.33316 | -0.36068 |
| H                                 | -7.50288 | 1.23044  | -0.00251 | H                                 | -7.57596 | 1.26509  | 0.12649  |
| H                                 | -6.15733 | 1.94886  | 0.88188  | H                                 | -6.21297 | 1.98837  | -0.74124 |
| H                                 | -6.42515 | -1.74595 | -0.88137 | H                                 | -6.21536 | 1.91114  | 1.02903  |
| H                                 | -7.65439 | -0.84065 | 0.00205  | H                                 | -7.73988 | -0.78313 | -0.33424 |
| H                                 | -6.42530 | -1.74117 | 0.89056  | H                                 | -6.48571 | -1.22297 | -1.50405 |
|                                   |          |          |          | H                                 | -6.50858 | -1.95422 | 0.10976  |

| Compound: PS-3                    |          |          |          | Compound: AB-1                    |          |          |          |
|-----------------------------------|----------|----------|----------|-----------------------------------|----------|----------|----------|
| Cartesian coordinates (after OPT) |          |          |          | Cartesian coordinates (after OPT) |          |          |          |
| C                                 | 0.59418  | 0.50950  | 0.02195  | N                                 | -3.62357 | 0.61906  | 0.00397  |
| C                                 | -0.34328 | -0.44615 | 0.01815  | N                                 | -2.88179 | -0.37436 | 0.00162  |
| C                                 | 2.03709  | 0.29557  | 0.01095  | C                                 | -5.01349 | 0.32372  | -0.00066 |
| C                                 | 2.63205  | -0.97387 | -0.00122 | C                                 | -5.54016 | -0.96619 | -0.00831 |
| C                                 | 3.99992  | -1.11927 | -0.01130 | C                                 | -6.90618 | -1.14614 | -0.01233 |
| C                                 | 4.79957  | 0.01449  | -0.00958 | C                                 | -7.72948 | -0.03183 | -0.00865 |
| C                                 | 4.25114  | 1.28524  | 0.00234  | C                                 | -7.22859 | 1.25470  | -0.00109 |
| C                                 | 2.87908  | 1.41438  | 0.01267  | C                                 | -5.85766 | 1.42616  | 0.00286  |
| C                                 | -1.78713 | -0.26409 | 0.02884  | C                                 | -1.49453 | -0.10338 | 0.00601  |
| C                                 | -2.41795 | 0.98406  | 0.03031  | C                                 | -0.94298 | 1.17536  | 0.01167  |
| C                                 | -3.78807 | 1.10595  | 0.04031  | C                                 | 0.42689  | 1.31872  | 0.01551  |
| C                                 | -4.62372 | -0.03020 | 0.05801  | C                                 | 1.25867  | 0.20084  | 0.01381  |
| C                                 | -3.99256 | -1.28646 | 0.04080  | C                                 | 0.70571  | -1.07666 | 0.00816  |
| C                                 | -2.61716 | -1.38627 | 0.03121  | C                                 | -0.66509 | -1.22120 | 0.00427  |
| N                                 | 6.24348  | -0.13590 | -0.02044 | N                                 | 2.64947  | 0.47337  | 0.01806  |
| O                                 | 6.70961  | -1.26560 | -0.02706 | N                                 | 3.37893  | -0.53429 | 0.01714  |
| O                                 | 6.93260  | 0.87322  | -0.02252 | C                                 | 4.76072  | -0.29547 | 0.02130  |
| N                                 | -5.98792 | 0.08796  | 0.09749  | C                                 | 5.35347  | 0.96784  | 0.01888  |
| C                                 | -6.60241 | 1.38652  | -0.09713 | C                                 | 6.71961  | 1.09952  | 0.02194  |
| C                                 | -6.81250 | -1.08934 | -0.08882 | C                                 | 7.56364  | -0.03211 | 0.03352  |
| H                                 | 0.29253  | 1.55108  | 0.03420  | C                                 | 6.95402  | -1.29878 | 0.02558  |
| H                                 | -0.02918 | -1.48524 | 0.00700  | C                                 | 5.58195  | -1.41637 | 0.02256  |
| H                                 | 2.01945  | -1.86436 | -0.00269 | N                                 | -9.18538 | -0.22605 | -0.01286 |
| H                                 | 4.45477  | -2.09845 | -0.02055 | O                                 | -9.60297 | -1.36859 | -0.01960 |
| H                                 | 4.89418  | 2.15258  | 0.00355  | O                                 | -9.88812 | 0.76692  | -0.00934 |
| H                                 | 2.44159  | 2.40454  | 0.02221  | N                                 | 8.92635  | 0.10266  | 0.05518  |
| H                                 | -1.82692 | 1.89126  | 0.01818  | C                                 | 9.52802  | 1.41173  | -0.08024 |
| H                                 | -4.21773 | 2.09628  | 0.03382  | C                                 | 9.76746  | -1.06805 | -0.06590 |
| H                                 | -4.57813 | -2.19324 | 0.03506  | H                                 | -4.86835 | -1.81190 | -0.01099 |
| H                                 | -2.16794 | -2.37315 | 0.02121  | H                                 | -7.34732 | -2.13185 | -0.01831 |
| H                                 | -6.37867 | 1.81093  | -1.08255 | H                                 | -7.90796 | 2.09388  | 0.00154  |
| H                                 | -6.27325 | 2.09628  | 0.66313  | H                                 | -5.41974 | 2.41520  | 0.00877  |
| H                                 | -7.68012 | 1.28405  | -0.00608 | H                                 | -1.59606 | 2.03612  | 0.01296  |
| H                                 | -6.60338 | -1.84082 | 0.67397  | H                                 | 0.88613  | 2.29874  | 0.01996  |
| H                                 | -7.85756 | -0.80759 | 0.00456  | H                                 | 1.36022  | -1.93603 | 0.00688  |
| H                                 | -6.66576 | -1.54993 | -1.07261 | H                                 | -1.12327 | -2.20190 | -0.00019 |
|                                   |          |          |          | H                                 | 4.72106  | 1.84462  | 0.01153  |
|                                   |          |          |          | H                                 | 7.14432  | 2.09196  | 0.01486  |
|                                   |          |          |          | H                                 | 7.55435  | -2.19551 | 0.02122  |
|                                   |          |          |          | H                                 | 5.11725  | -2.39432 | 0.01823  |
|                                   |          |          |          | H                                 | 10.60868 | 1.31380  | -0.02174 |
|                                   |          |          |          | H                                 | 9.27934  | 1.88723  | -1.03558 |
|                                   |          |          |          | H                                 | 9.21290  | 2.07899  | 0.72489  |
|                                   |          |          |          | H                                 | 10.80954 | -0.76612 | -0.00480 |
|                                   |          |          |          | H                                 | 9.61766  | -1.59090 | -1.01730 |
|                                   |          |          |          | H                                 | 9.57986  | -1.77589 | 0.74452  |

| Compound: AB-2                    |           |           |           | Compound: AB-3                    |            |           |           |
|-----------------------------------|-----------|-----------|-----------|-----------------------------------|------------|-----------|-----------|
| Cartesian coordinates (after OPT) |           |           |           | Cartesian coordinates (after OPT) |            |           |           |
| N                                 | -3.691255 | 0.601407  | -0.136866 | N                                 | 3.766897   | -0.620995 | 0.028724  |
| N                                 | -2.949088 | -0.369167 | 0.070459  | N                                 | 3.024564   | 0.370712  | -0.047722 |
| C                                 | -5.081407 | 0.313911  | -0.067754 | C                                 | 5.155851   | -0.325084 | 0.016979  |
| C                                 | -5.607295 | -0.946025 | 0.209636  | C                                 | 5.682756   | 0.962004  | -0.071483 |
| C                                 | -6.973311 | -1.120750 | 0.254205  | C                                 | 7.048590   | 1.142964  | -0.075221 |
| C                                 | -7.796565 | -0.031295 | 0.020362  | C                                 | 7.873005   | 0.032650  | 0.009708  |
| C                                 | -7.296306 | 1.225303  | -0.256217 | C                                 | 7.372224   | -1.251105 | 0.098168  |
| C                                 | -5.925344 | 1.391821  | -0.298970 | C                                 | 6.001588   | -1.423518 | 0.101308  |
| C                                 | -1.560815 | -0.102772 | 0.005538  | C                                 | 1.640428   | 0.103890  | -0.037841 |
| C                                 | -1.013727 | 1.147058  | -0.269474 | C                                 | 1.079929   | -1.168514 | 0.045476  |
| C                                 | 0.356773  | 1.288866  | -0.307129 | C                                 | -0.289093  | -1.307557 | 0.045320  |
| C                                 | 1.199735  | 0.201289  | -0.074320 | C                                 | -1.144630  | -0.200185 | -0.033732 |
| C                                 | 0.641277  | -1.044401 | 0.201257  | C                                 | -0.561972  | 1.066668  | -0.123232 |
| C                                 | -0.728652 | 1.193201  | 0.239285  | C                                 | 0.807945   | 1.214906  | -0.123040 |
| C                                 | 2.652823  | 0.395720  | -0.126636 | C                                 | -2.587056  | -0.428197 | -0.021402 |
| N                                 | 3.470406  | -0.554524 | 0.050244  | C                                 | -3.537976  | 0.509423  | 0.017142  |
| C                                 | 4.854646  | -0.322250 | 0.034834  | C                                 | -4.981175  | 0.304695  | 0.029406  |
| C                                 | 5.457582  | 0.853247  | 0.473057  | C                                 | -5.592760  | -0.945105 | -0.083626 |
| C                                 | 6.828672  | 1.010311  | 0.441575  | C                                 | -6.960946  | -1.090381 | -0.063163 |
| C                                 | 7.666013  | -0.002473 | -0.050008 | C                                 | -7.810711  | 0.021093  | 0.081458  |
| C                                 | 7.052769  | -1.198623 | -0.453949 | C                                 | -7.201415  | 1.280368  | 0.175106  |
| C                                 | 5.683749  | -1.350811 | -0.398191 | C                                 | -5.827633  | 1.404547  | 0.152180  |
| N                                 | 9.03668   | 0.168051  | -0.128116 | N                                 | -9.180399  | -0.124603 | 0.135467  |
| C                                 | 9.873488  | -0.991129 | -0.348998 | C                                 | -10.018024 | 1.051136  | 0.045838  |
| C                                 | 9.640376  | 1.297572  | 0.543463  | C                                 | -9.771523  | -1.398569 | -0.211610 |
| N                                 | -9.252838 | -0.219897 | 0.068477  | N                                 | 9.328098   | 0.227786  | 0.005580  |
| O                                 | -9.669854 | -1.335776 | 0.314077  | O                                 | 9.745571   | 1.367901  | -0.072969 |
| O                                 | -9.955329 | 0.750949  | -0.140081 | O                                 | 10.031855  | -0.761854 | 0.080936  |
| H                                 | -4.935387 | -1.772887 | 0.386875  | H                                 | 5.010632   | 1.804958  | -0.136279 |
| H                                 | -7.414358 | -2.083420 | 0.466374  | H                                 | 7.488950   | 2.126760  | -0.142541 |
| H                                 | -7.975995 | 2.045590  | -0.432036 | H                                 | 8.051876   | -2.087598 | 0.162601  |
| H                                 | -5.487710 | 2.357820  | -0.511830 | H                                 | 5.564418   | -2.410592 | 0.169068  |
| H                                 | -1.669488 | 1.986679  | -0.449676 | H                                 | 1.728087   | -2.030981 | 0.108956  |
| H                                 | 0.790339  | 2.258932  | -0.521748 | H                                 | -0.722976  | -2.298385 | 0.111168  |
| H                                 | 1.300992  | -1.881913 | 0.382334  | H                                 | -1.184654  | 1.947564  | -0.200990 |
| H                                 | -1.182725 | -2.152598 | 0.451045  | H                                 | 1.262107   | 2.195051  | -0.192873 |
| H                                 | 2.987939  | 1.416129  | -0.345678 | H                                 | -2.877863  | -1.473389 | -0.033147 |
| H                                 | 4.851843  | 1.649866  | 0.886940  | H                                 | -3.237663  | 1.552177  | 0.053966  |
| H                                 | 7.247881  | 1.930722  | 0.818913  | H                                 | -4.987423  | -1.834969 | -0.201020 |
| H                                 | 7.648346  | -2.026402 | -0.807737 | H                                 | -7.374665  | -2.082445 | -0.163229 |
| H                                 | 5.229231  | -2.284738 | -0.703547 | H                                 | -7.800049  | 2.173850  | 0.266918  |
| H                                 | 10.912281 | -0.673587 | -0.399781 | H                                 | -5.394483  | 2.395514  | 0.230564  |
| H                                 | 9.780052  | -1.741126 | 0.447348  | H                                 | -9.809723  | 1.743653  | 0.862922  |
| H                                 | 9.633887  | -1.471666 | -1.298437 | H                                 | -11.059907 | 0.752246  | 0.130305  |
| H                                 | 10.710822 | 1.293072  | 0.351951  | H                                 | -9.889707  | 1.590931  | -0.901027 |
| H                                 | 9.484242  | 1.280733  | 1.630326  | H                                 | -9.557788  | -1.696957 | -1.245774 |
| H                                 | 9.245053  | 2.238129  | 0.157594  | H                                 | -9.417044  | -2.189481 | 0.451142  |
|                                   |           |           |           | H                                 | -10.850070 | -1.333357 | -0.091300 |

| <b>KDP</b>                        | <b>PNA</b>                        | <b>UREA</b>                       |
|-----------------------------------|-----------------------------------|-----------------------------------|
| Cartesian coordinates (after OPT) | Cartesian coordinates (after OPT) | Cartesian coordinates (after OPT) |
| K -2.39124 0.00174 0.02113        | C -0.02582 -1.20635 0.00899       | N -1.13114 0.61613 0.01197        |
| P 0.79578 -0.00581 -0.03019       | C 1.35328 -1.20455 0.00890        | C -0.00210 -0.13840 0.01979       |
| O 0.02263 -0.15766 -1.29404       | C 2.06905 -0.00003 -0.00205       | O -0.02511 -1.36434 0.00810       |
| O 1.80237 -1.26907 0.06261        | C 1.35330 1.20451 -0.01238        | N 1.15576 0.57359 0.02626         |
| O 1.79891 1.25405 -0.21618        | C -0.02580 1.20634 -0.01104       | H -1.11595 1.62369 -0.06371       |
| O 0.04509 0.14456 1.25570         | C -0.69614 0.00001 -0.00051       | H -1.99200 0.12584 -0.15793       |
| H 2.13841 -1.39159 0.95816        | N 3.43338 -0.00011 -0.01202       | H 1.97504 0.08373 -0.28971        |
| H 2.00632 1.67062 0.62856         | N -2.16096 0.00002 0.00100        | H 1.17410 1.58376 0.06022         |
|                                   | O -2.72419 0.02783 1.05714        |                                   |
|                                   | O -2.72649 -0.02780 -1.05388      |                                   |
|                                   | H -0.57175 -2.14068 0.01737       |                                   |
|                                   | H 1.88871 -2.14554 0.01689        |                                   |
|                                   | H 1.88879 2.14546 -0.02180        |                                   |
|                                   | H -0.57172 2.14070 -0.01808       |                                   |
|                                   | H 3.94859 0.86023 0.04551         |                                   |
|                                   | H 3.94863 -0.85936 0.05976        |                                   |

## S2. Geometric parameters of the compounds

**Table S1.** Bond length, bond angle, and torsion angle of all compounds investigated in this work after geometry optimization in the gas phase. Between parentheses, CIF 234915 (PS-1) and 1217889 (PS-2) refer to experimental X-ray values.

| Compounds      |      | Bond length (Å) |               | Bond angle (°) |                 | Torsion angle (°) |                   |
|----------------|------|-----------------|---------------|----------------|-----------------|-------------------|-------------------|
| System Type I  | PS-1 | C1-N1           | 1.416 (1.423) | C1-N1-N2       | 114.60 (112.57) | C1-N1-N2-C7       | -179.98 (-179.94) |
|                |      | N1-N2           | 1.249 (1.258) | N1-N2-C7       | 116.85 (114.98) | N1-N2-C7-C8       | -0.01 (-3.62)     |
|                |      | C4-N3           | 1.458 (1.434) | C4-N3-O1       | 118.24 (118.63) | C3-C4-N3-O2       | 179.98 (173.79)   |
|                |      | C10-N4          | 1.355 (1.371) | C4-N3-O2       | 118.25 (117.59) | C4-N3-O1-O2       | 180.00 (-179.72)  |
|                |      | N4-C13          | 1.451 (1.453) | C10-N4-C13     | 120.24 (121.10) | C10-N4-C14-C13    | 179.97 (179.37)   |
|                | PS-2 | N3-O1           | 1.220 (1.226) | C5-C4-N3       | 118.98 (118.17) | C11-10-N4-C14     | 0.01 (9.61)       |
|                |      | C5-N1           | 1.375 (1.387) | C11-N2-O1      | 118.21 (118.17) | C11-N2-O1-O2      | -179.98 (179.42)  |
|                |      | N1-C2           | 1.445 (1.446) | C5-N1-C1       | 119.18 (119.53) | C10-C11-N1-O2     | 0.09 (-3.50)      |
|                |      | C11-N2          | 1.461 (1.477) | C5-N1-C2       | 119.23 (118.39) | C5-N1-C2-C1       | 157.09 (-157.27)  |
|                |      | N2-O1           | 1.212 (1.229) | C10-C11-N2     | 118.88 (118.79) | C6-C5-N1-C2       | 13.19 (-8.66)     |
|                | PS-3 | C1-C2           | 1.339         | C1-C2-C3       | 126.01          | C1-C2-C3-C9       | 180.00            |
|                |      | C1-C3           | 1.459         | C2-C9-C10      | 124.00          | C12-N2-C15-C16    | 161.00            |
|                |      | C12-N2          | 1.370         | C12-N2-C16     | 119.52          | C13-C12-N2-C15    | 10.02             |
|                |      | N2-C15          | 1.450         | C4-C3-C1       | 123.55          | C6-N1-O1-O2       | 180.00            |
|                |      | N1-O2           | 1.222         | C6-N1-O2       | 118.38          | C5-C6-N1-O1       | -0.20             |
|                |      | C1-C2           | 1.339         | C1-C2-C3       | 126.01          | C1-C2-C3-C9       | 180.00            |
| System Type II | AB-1 | C1-N1           | 1.421         | C1-N1-N2       | 114.91          | C1-N1-N2-C7       | 180.00            |
|                |      | N1-N2           | 1.240         | N1-N2-C7       | 115.80          | C10-N3-N4-C13     | 180.00            |
|                |      | C10-N3          | 1.416         | C10-N3-N4      | 114.93          | C4-N4-O1-O2       | 180.00            |
|                |      | N3-N4           | 1.246         | N3-N4-C13      | 116.71          | C18-N3-C22-C21    | 179.92            |
|                |      | N4-C13          | 1.396         | C16-N6-C19     | 120.50          | C18-N3-C21-C22    | -179.92           |
|                |      | C4-N5           | 1.463         | C16-N6-C20     | 120.22          | C17-C16-N6-C19    | -0.04             |
|                |      | C16-N6          | 1.357         | C4-N5-O2       | 118.13          | C17-C18-N6-C20    | 0.05              |
|                |      | N6-C19          | 1.451         | C5-C4-N5       | 118.80          | C18-C17-C16-N3    | 180.00            |
|                |      | N5-O2           | 1.216         | C15-C16-N6     | 121.40          | C5-C4-N4-O1       | 179.99            |
|                | AB-2 | C1-N1           | 1.421         | C1-N1-N2       | 114.78          | C1-N1-N2-C7       | 179.98            |
|                |      | N1-N2           | 1.239         | N1-N2-C7       | 115.62          | C10-C13-N3-C14    | -177.97           |
|                |      | N2-C7           | 1.415         | C10-C13-N3     | 122.63          | C17-N4-C19-C20    | 154.47            |
|                |      | C10-C13         | 1.467         | C12-N3-C14     | 120.73          | C17-N4-C19-C20    | -154.48           |
|                |      | C13-N3          | 1.266         | C17-N4-C19     | 118.92          | C4-N5-O2-O1       | -180.00           |
|                |      | C17-N4          | 1.383         | C4-N5-O2       | 117.67          | C16-C17-N4-C20    | 166.11            |
|                |      | N6-C20          | 1.446         | C4-N5-O2       | 117.66          | C3-C4-N5-O2       | -179.99           |
|                |      | N5-O2           | 1.216         | C16-C17-N4     | 121.47          | C17-N4-C19-C20    | 154.47            |
|                | AB-3 | C1-N1           | 1.420         | C1-N1-N2       | 114.71          | C1-N1-N2-C7       | -179.99           |
|                |      | N1-N2           | 1.241         | N1-N2-C7       | 115.82          | C10-C13-C14-C15   | 179.96            |
|                |      | N2-C7           | 1.410         | C10-C13-C14    | 126.42          | C4-N4-O2-O1       | 180.00            |
|                |      | C13-C14         | 1.336         | C18-N3-C22     | 119.32          | C18-N3-C22-C21    | 157.74            |
|                |      | C18-N3          | 1.378         | C4-N4-O2       | 117.71          | C17-C18-N3-C22    | -11.76            |
|                |      | N3-C22          | 1.447         | C4-N4-O1       | 117.70          | C17-C18-N3-C21    | 11.22             |
|                |      | N4-O2           | 1.217         | C13-C14-C15    | 127.53          | C18-N3-C22-C22    | -157.70           |

### S3. First-Order Molecular Hyperpolarizability Calculation

**Table S2-A.** Calculated values of static ( $\beta_0$ ) and dynamic ( $\beta_{HRS}$ ) first-order molecular hyperpolarizability of all compounds using the CAM-B3LYP level of theory with an incident wavelength of 1064 nm. All values are presented in units of  $10^{-30} \text{ cm}^4 \text{ statvolt}^{-1}$  both in the gas phase and solvent medium.

| Compound    | In a vacuum     |                                    | In DMSO         |                                    |
|-------------|-----------------|------------------------------------|-----------------|------------------------------------|
|             | $\beta (0,0,0)$ | $\beta (-2\omega, \omega, \omega)$ | $\beta (0,0,0)$ | $\beta (-2\omega, \omega, \omega)$ |
| <b>KDP</b>  | 0.8             | 0.9                                | 0.3             | 0.2                                |
| <b>Urea</b> | 0.4             | 0.4                                | 0.6             | 0.5                                |
| <b>PNA</b>  | 5.5             | 8.6                                | 22.0            | 21.5                               |

**Table S2-B.** Calculated values of static ( $\beta_0$ ) and dynamic ( $\beta_{HRS}$ ) first-order molecular hyperpolarizability of all compounds using the CAM-B3LYP level of theory with an incident wavelength of 1330 nm. All values are presented in units of  $10^{-30} \text{ cm}^4 \text{ statvolt}^{-1}$  both in the gas phase and solvent medium.

| Compound    | In a vacuum     |                                    | In DMSO         |                                    |
|-------------|-----------------|------------------------------------|-----------------|------------------------------------|
|             | $\beta (0,0,0)$ | $\beta (-2\omega, \omega, \omega)$ | $\beta (0,0,0)$ | $\beta (-2\omega, \omega, \omega)$ |
| <b>KDP</b>  | 0.8             | 0.8                                | 0.3             | 0.2                                |
| <b>Urea</b> | 0.3             | 0.3                                | 0.6             | 0.5                                |
| <b>PNA</b>  | 5.5             | 7.3                                | 22.0            | 17.2                               |

**Table S2-C.** Calculated values of static ( $\beta_0$ ) and dynamic ( $\beta_{HRS}$ ) first-order molecular hyperpolarizability of all compounds using the CAM-B3LYP level of theory with an incident wavelength of 1550 nm. All values are presented in units of  $10^{-30} \text{ cm}^4 \text{ statvolt}^{-1}$  both in the gas phase and solvent medium.

| Compound    | In a vacuum     |                                    | In DMSO         |                                    |
|-------------|-----------------|------------------------------------|-----------------|------------------------------------|
|             | $\beta (0,0,0)$ | $\beta (-2\omega, \omega, \omega)$ | $\beta (0,0,0)$ | $\beta (-2\omega, \omega, \omega)$ |
| <b>KDP</b>  | 0.8             | 0.9                                | 0.3             | 0.2                                |
| <b>Urea</b> | 0.4             | 0.4                                | 0.6             | 0.5                                |
| <b>PNA</b>  | 5.5             | 6.7                                | 22.0            | 15.2                               |

**Table S3-A.** Calculated values of static ( $\beta_0$ ) and dynamic ( $\beta_{HRS}$ ) first-order molecular hyperpolarizability of all compounds using the B3LYP level of theory with an incident wavelength of 1064 nm. All values are presented in units of  $10^{-30} \text{ cm}^4 \text{ statvolt}^{-1}$  both in the gas phase and solvent medium.

| Compound  |      | In a vacuum     |                                    | In DMSO         |                                    |
|-----------|------|-----------------|------------------------------------|-----------------|------------------------------------|
|           |      | $\beta (0,0,0)$ | $\beta (-2\omega, \omega, \omega)$ | $\beta (0,0,0)$ | $\beta (-2\omega, \omega, \omega)$ |
| System I  | PS-1 | 73.2            | 394.0                              | 356.0           | 18744.9                            |
|           | PS-2 | 103.4           | 2001.4                             | 434.6           | 1658.8                             |
|           | PS-3 | 95.9            | 620.4                              | 463.7           | 3900.6                             |
| System II | AB-1 | 233.0           | 11153.9                            | 871.3           | 3943.2                             |
|           | AB-2 | 322.2           | 1795.4                             | 1004.6          | 2844.0                             |
|           | AB-3 | 337.4           | 3635.5                             | 1434.4          | 3978.1                             |

**Table S3-B.** Calculated static ( $\beta_0$ ) and dynamic first-order molecular hyperpolarizability ( $\beta_{HRS}$ ) of the investigated compounds using the B3LYP level of theory with an incident wavelength of 1310 nm.  $\beta$  values are presented in units of  $10^{-30} \text{ cm}^4 \text{ statvolt}^{-1}$  both in the gas phase and solvent medium.

| Compound  |      | In a vacuum     |                                    | In DMSO         |                                    |
|-----------|------|-----------------|------------------------------------|-----------------|------------------------------------|
|           |      | $\beta (0,0,0)$ | $\beta (-2\omega, \omega, \omega)$ | $\beta (0,0,0)$ | $\beta (-2\omega, \omega, \omega)$ |
| System I  | PS-1 | 73.2            | 179.6                              | 356.0           | 800.0                              |
|           | PS-2 | 103.4           | 350.1                              | 434.6           | 2375.2                             |
|           | PS-3 | 95.9            | 251.8                              | 463.7           | 1321.7                             |
| System II | AB-1 | 106.0           | 221.0                              | 871.3           | 12721.1                            |
|           | AB-2 | 322.2           | 10205.2                            | 1004.6          | 5981.5                             |
|           | AB-3 | 337.4           | 2608.2                             | 1434.4          | 11313.6                            |



**Table S3-C.** Calculated static ( $\beta_0$ ) and dynamic first-order molecular hyperpolarizability ( $\beta_{HRS}$ ) of the investigated compounds using the B3LYP level of theory with an incident wavelength of 1550 nm.  $\beta$  values are presented in units of  $10^{-30}\text{cm}^4 \text{statvolt}^{-1}$  both in the gas phase and solvent medium.

| Compound  |      | In a vacuum    |                                   | In DMSO        |                                   |
|-----------|------|----------------|-----------------------------------|----------------|-----------------------------------|
|           |      | $\beta(0,0,0)$ | $\beta(-2\omega, \omega, \omega)$ | $\beta(0,0,0)$ | $\beta(-2\omega, \omega, \omega)$ |
| System I  | PS-1 | 73.2           | 131.8                             | 356.0          | 451.6                             |
|           | PS-2 | 103.4          | 222.2                             | 434.6          | 812.2                             |
|           | PS-3 | 95.9           | 179.7                             | 463.7          | 659.9                             |
| System II | AB-1 | 233.0          | 616.6                             | 871.3          | 2244.0                            |
|           | AB-2 | 322.2          | 1382.2                            | 1004.6         | 6912.3                            |
|           | AB-3 | 337.4          | 1129.5                            | 1434.4         | 6596.7                            |

**Table S3-D.** Calculated static ( $\beta_0$ ) and dynamic first-order molecular hyperpolarizability ( $\beta_{HRS}$ ) of the investigated compounds using the CAM-B3LYP level of theory with an incident wavelength of 1064 nm.  $\beta$  values are presented in units of  $10^{-30}\text{cm}^4 \text{statvolt}^{-1}$  both in the gas phase and solvent medium.

| Compound  |      | In a vacuum    |                                   | In DMSO        |                                   |
|-----------|------|----------------|-----------------------------------|----------------|-----------------------------------|
|           |      | $\beta(0,0,0)$ | $\beta(-2\omega, \omega, \omega)$ | $\beta(0,0,0)$ | $\beta(-2\omega, \omega, \omega)$ |
| System I  | PS-1 | 50.0           | 131.4                             | 181.5          | 411.6                             |
|           | PS-2 | 42.5           | 112.5                             | 127.6          | 285.5                             |
|           | PS-3 | 50.5           | 124.8                             | 187.4          | 417.0                             |
| System II | AB-1 | 100.10         | 351.0                             | 284.4          | 1011.3                            |
|           | AB-2 | 91.4           | 333.3                             | 193.4          | 613.1                             |
|           | AB-3 | 132.30         | 505.1                             | 356.6          | 1423.5                            |

**Table S3-E.** Calculated static ( $\beta_0$ ) and dynamic first-order molecular hyperpolarizability ( $\beta_{HRS}$ ) of the investigated compounds using the CAM-B3LYP level of theory with an incident wavelength of 1310 nm.  $\beta$  values are presented in units of  $10^{-30} \text{cm}^4 \text{statvolt}^{-1}$  both in the gas phase and solvent medium.

| Compound  |      | In a vacuum    |                                   | In DMSO        |                                   |
|-----------|------|----------------|-----------------------------------|----------------|-----------------------------------|
|           |      | $\beta(0,0,0)$ | $\beta(-2\omega, \omega, \omega)$ | $\beta(0,0,0)$ | $\beta(-2\omega, \omega, \omega)$ |
| System I  | PS-1 | 50.0           | 88.7                              | 181.5          | 227.5                             |
|           | PS-2 | 42.5           | 76.0                              | 127.6          | 170.9                             |
|           | PS-3 | 50.5           | 87.1                              | 187.4          | 242.0                             |
| System II | AB-1 | 100.10         | 206.3                             | 284.4          | 469.3                             |
|           | AB-2 | 91.4           | 193.2                             | 193.4          | 324.0                             |
|           | AB-3 | 132.30         | 284.9                             | 356.6          | 630.9                             |

**Table S3-F.** Calculated static ( $\beta_0$ ) and dynamic first-order molecular hyperpolarizability ( $\beta_{HRS}$ ) of the investigated compounds using the CAM-B3LYP level of theory with an incident wavelength of 1550 nm.  $\beta$  values are presented in units of  $10^{-30} \text{cm}^4 \text{statvolt}^{-1}$  both in the gas phase and solvent medium.

| Compound  |      | In a vacuum    |                                   | In DMSO        |                                   |
|-----------|------|----------------|-----------------------------------|----------------|-----------------------------------|
|           |      | $\beta(0,0,0)$ | $\beta(-2\omega, \omega, \omega)$ | $\beta(0,0,0)$ | $\beta(-2\omega, \omega, \omega)$ |
| System I  | PS-1 | 50.0           | 73.8                              | 181.5          | 176.6                             |
|           | PS-2 | 42.5           | 63.1                              | 127.6          | 135.8                             |
|           | PS-3 | 50.5           | 73.3                              | 187.4          | 190.4                             |
| System II | AB-1 | 100.10         | 162.70                            | 284.4          | 344.5                             |
|           | AB-2 | 91.4           | 151.2                             | 193.4          | 245.9                             |
|           | AB-3 | 132.30         | 221.1                             | 356.6          | 456.2                             |

**Table S3-G.** Calculated static ( $\beta_0$ ) and dynamic first-order molecular hyperpolarizability ( $\beta_{HRS}$ ) of the investigated compounds using the M06-2X level of theory with an incident wavelength of 1064 nm.  $\beta$  values are presented in units of  $10^{-30}\text{cm}^4\text{statvolt}^{-1}$  both in the gas phase and solvent medium.

| Compound  |      | In a vacuum    |                                   | In DMSO        |                                   |
|-----------|------|----------------|-----------------------------------|----------------|-----------------------------------|
|           |      | $\beta(0,0,0)$ | $\beta(-2\omega, \omega, \omega)$ | $\beta(0,0,0)$ | $\beta(-2\omega, \omega, \omega)$ |
| System I  | PS-1 | 50.3           | 132.9                             | 185.4          | 418.6                             |
|           | PS-2 | 47.4           | 129.0                             | 130.5          | 297.4                             |
|           | PS-3 | 56.0           | 144.7                             | 188.9          | 421.2                             |
| System II | AB-1 | 106.0          | 378.8                             | 269.1          | 912.6                             |
|           | AB-2 | 97.0           | 376.2                             | 191.3          | 641.3                             |
|           | AB-3 | 138.6          | 554.3                             | 344.7          | 1353.7                            |

**Table S3-H.** Calculated static ( $\beta_0$ ) and dynamic first-order molecular hyperpolarizability ( $\beta_{HRS}$ ) of the investigated compounds using the M06-2X level of theory with an incident wavelength of 1310 nm.  $\beta$  values are presented in units of  $10^{-30}\text{cm}^4\text{statvolt}^{-1}$  both in the gas phase and solvent medium.

| Compound  |      | In a vacuum    |                                   | In DMSO        |                                   |
|-----------|------|----------------|-----------------------------------|----------------|-----------------------------------|
|           |      | $\beta(0,0,0)$ | $\beta(-2\omega, \omega, \omega)$ | $\beta(0,0,0)$ | $\beta(-2\omega, \omega, \omega)$ |
| System I  | PS-1 | 50.3           | 132.9                             | 185.4          | 418.6                             |
|           | PS-2 | 47.4           | 85.9                              | 130.5          | 176.1                             |
|           | PS-3 | 56.0           | 98.9                              | 188.9          | 244.8                             |
| System II | AB-1 | 106.0          | 221.0                             | 269.1          | 441.9                             |
|           | AB-2 | 97.0           | 210.8                             | 191.3          | 329.1                             |
|           | AB-3 | 138.6          | 305.2                             | 344.7          | 607.7                             |

**Table S3-I.** Calculated static ( $\beta_0$ ) and dynamic first-order molecular hyperpolarizability ( $\beta_{HRS}$ ) of the investigated compounds using the M06-2X level of theory with an incident wavelength of 1550 nm.  $\beta$  values are presented in units of  $10^{-30}\text{cm}^4\text{statvolt}^{-1}$  both in the gas phase and solvent medium.

| Compound  |      | In a vacuum    |                                   | In DMSO        |                                   |
|-----------|------|----------------|-----------------------------------|----------------|-----------------------------------|
|           |      | $\beta(0,0,0)$ | $\beta(-2\omega, \omega, \omega)$ | $\beta(0,0,0)$ | $\beta(-2\omega, \omega, \omega)$ |
| System I  | PS-1 | 50.3           | 74.4                              | 185.4          | 180.6                             |
|           | PS-2 | 47.4           | 71.0                              | 130.5          | 139.4                             |
|           | PS-3 | 56.0           | 82.5                              | 188.9          | 192.5                             |
| System II | AB-1 | 106.0          | 173.6                             | 269.1          | 327.5                             |
|           | AB-2 | 97.0           | 163.2                             | 191.3          | 247.6                             |
|           | AB-3 | 138.6          | 235.0                             | 344.7          | 440.7                             |

#### S4. Methods of Synthesis for the Investigated Compounds

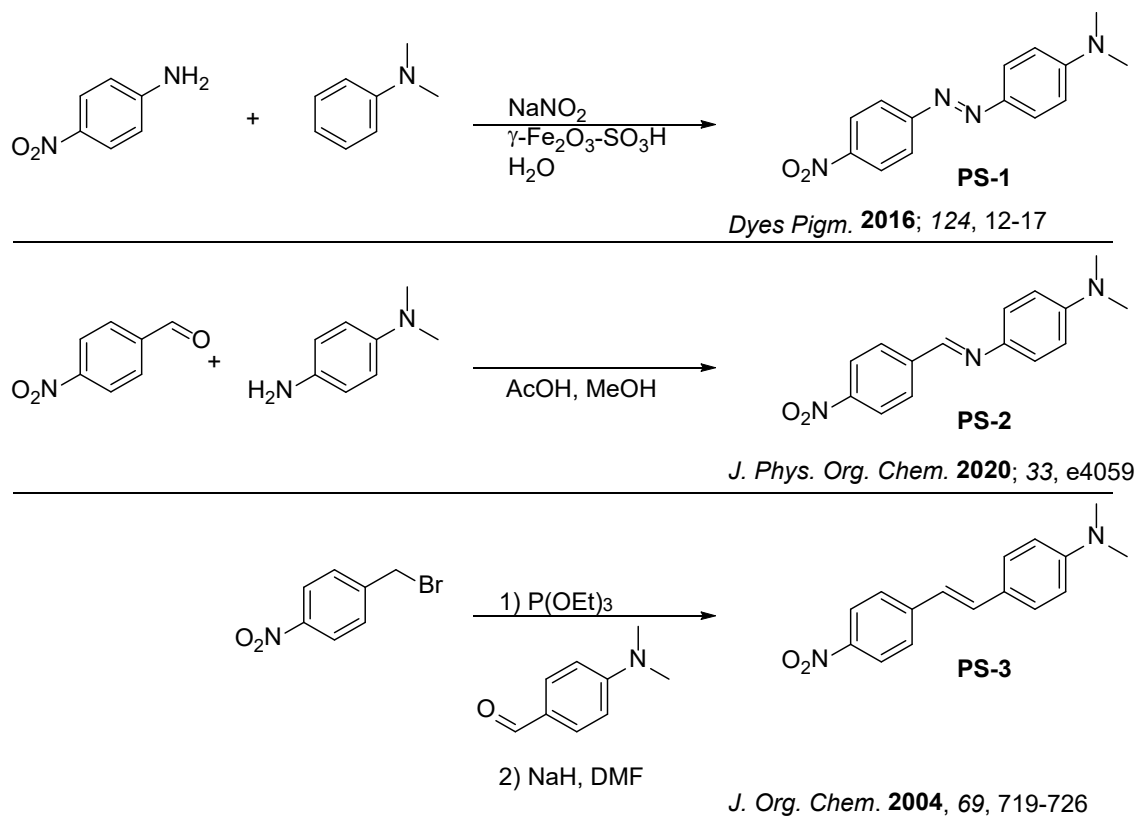

**Scheme S1:** Synthetic approach to access PS-01, PS-02, PS-03

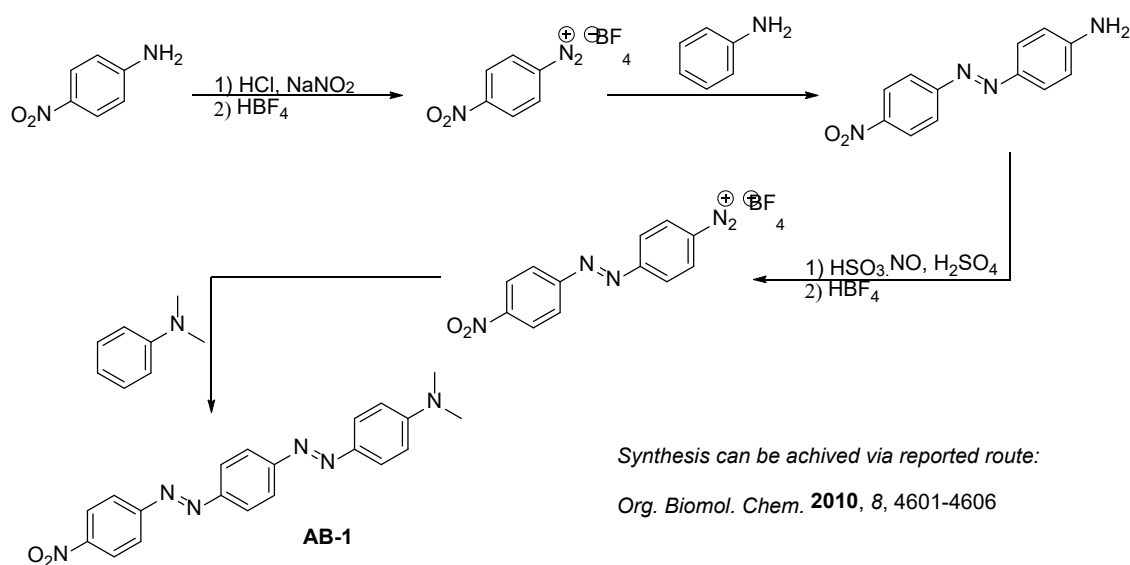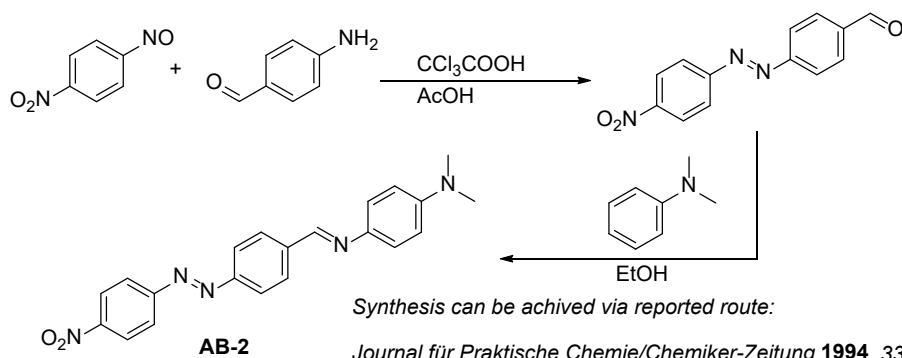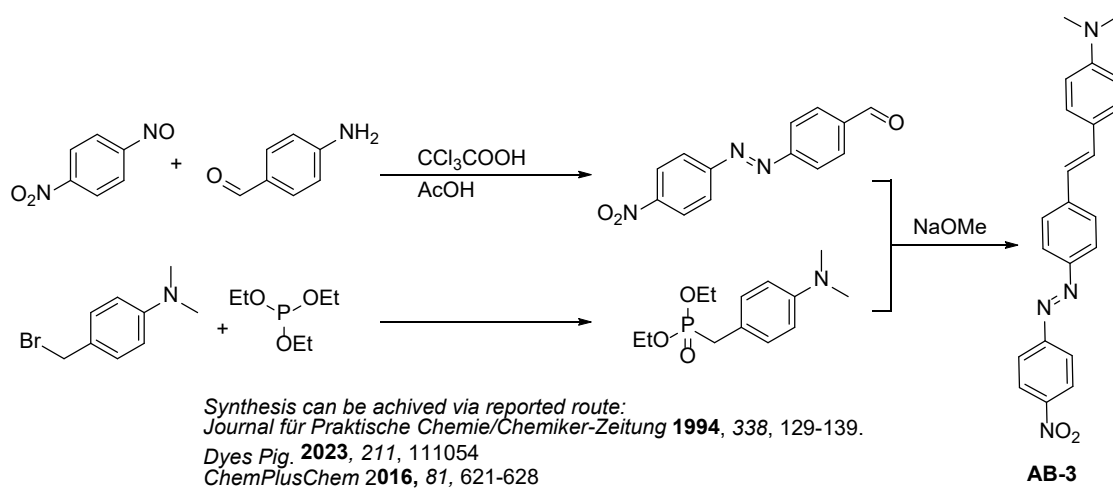

**Scheme S2:** Possible synthetic approach to access **AB-01**, **AB-02**, **AB-03**
